# Supplementary material
Source: HighWire-hosted journal article supplement (https://heartasia.bmj.com/highwire/filestream/136941/field_highwire_adjunct_files/0/heartasia-2015-010634supp.pdf)

Appendix Figure A. Individual evaluation of quality /risk of bias of included studies in the metaanalysis.

|                           | Random sequence generation (selection bias) | Allocation concealment (selection bias) | Blinding of participants and personnel (performance bias) | Blinding of outcome assessment (detection bias) | Incomplete outcome data (attrition bias) |
|---------------------------|---------------------------------------------|-----------------------------------------|-----------------------------------------------------------|-------------------------------------------------|------------------------------------------|
| Abraham 2002 MIRACLE      | +                                           | +                                       | +                                                         | +                                               | +                                        |
| Abraham2004 MIRACLE/ICDII | +                                           | +                                       | +                                                         | +                                               | +                                        |
| Albertsen 2008            | ?                                           | ?                                       | ?                                                         | ?                                               | +                                        |
| Auricchio 2003 PATH-CHF   | +                                           | +                                       | +                                                         | ?                                               | ?                                        |
| Bänsch 2002 CAT           | +                                           | +                                       | +                                                         | ?                                               | ?                                        |
| Bardy 2005 SCD-HeFT       | +                                           | +                                       | +                                                         | +                                               | +                                        |
| Beshai 2007 RethinQ       | +                                           | +                                       | +                                                         | ?                                               | ?                                        |
| Bigger 1997 CABG Patch    | ?                                           | ?                                       | ?                                                         | ?                                               | ?                                        |
| Brignole 2005 OPSITE      | ?                                           | ?                                       | +                                                         | ?                                               | +                                        |
| Brignole 2011 APAF        | +                                           | +                                       | +                                                         | +                                               | +                                        |
| Bristow 2004 COMPANION    | ?                                           | ?                                       | +                                                         | +                                               | +                                        |
| Buxton 1999 MUSTT         | ?                                           | ?                                       | ?                                                         | ?                                               | +                                        |
| Cazeau 2001 MUSTIC-SR     | ?                                           | ?                                       | +                                                         | ?                                               | +                                        |
| Cleland 2005 CARE-HF      | ?                                           | ?                                       | +                                                         | +                                               | ?                                        |
| Curtis 2013 BLOCK HF      | ?                                           | ?                                       | +                                                         | +                                               | +                                        |
| Diab 2011                 | +                                           | +                                       | +                                                         | ?                                               | +                                        |
| Doshi 2005 PAVE-VecToR    | ?                                           | ?                                       | +                                                         | ?                                               | +                                        |
| Foley 2011 RESPOND        | +                                           | +                                       | +                                                         | ?                                               | +                                        |
| Goscinska 2008            | ?                                           | ?                                       | +                                                         | ?                                               | ?                                        |
| Higgins 2003 CONTAK-CD    | ?                                           | ?                                       | +                                                         | ?                                               | ?                                        |
| Hohnloser 2004 DINAMIT    | +                                           | +                                       | +                                                         | +                                               | +                                        |
| Höijer 2006               | ?                                           | ?                                       | +                                                         | ?                                               | +                                        |
| Kadish 2004 DEFINITE      | ?                                           | ?                                       | ?                                                         | +                                               | ?                                        |
| Kindermann 2006 HOBIPACE  | ?                                           | ?                                       | +                                                         | ?                                               | +                                        |
| Leclercq 2002 MUSTIC-AF   | ?                                           | ?                                       | +                                                         | ?                                               | ?                                        |
| Leclercq 2007 RD-CHF      | ?                                           | ?                                       | +                                                         | ?                                               | +                                        |
| Linde 2008 REVERSE        | ?                                           | ?                                       | +                                                         | +                                               | ?                                        |
| Lozano2000 VENTAK/CONTAK  | ?                                           | ?                                       | ?                                                         | ?                                               | ?                                        |
| Martinelli 2002           | ?                                           | ?                                       | +                                                         | +                                               | ?                                        |
| Martinelli 2010 COMBAT    | +                                           | +                                       | +                                                         | +                                               | ?                                        |
| Moss 1996 MADIT           | ?                                           | ?                                       | +                                                         | ?                                               | ?                                        |
| Moss 2002 MADIT II        | ?                                           | ?                                       | +                                                         | ?                                               | ?                                        |
| Moss 2009 MADIT-CRT       | ?                                           | ?                                       | ?                                                         | +                                               | +                                        |
| Orlov 2010 AVAIL CLS/CRT  | ?                                           | ?                                       | +                                                         | ?                                               | +                                        |
| Piccirillo 2006           | ?                                           | ?                                       | ?                                                         | ?                                               | +                                        |
| Piepoli 2008              | ?                                           | ?                                       | ?                                                         | ?                                               | ?                                        |
| Pinter 2009               | ?                                           | ?                                       | +                                                         | +                                               | +                                        |
| Pokushalov 2010           | +                                           | +                                       | +                                                         | ?                                               | +                                        |
| Res 2007 BRIGHT           | ?                                           | ?                                       | +                                                         | ?                                               | ?                                        |
| RHYTHM ICD 2004           | ?                                           | ?                                       | +                                                         | ?                                               | ?                                        |
| Saxon 2002 VIGOR          | ?                                           | ?                                       | ?                                                         | ?                                               | ?                                        |
| Steinbeck 2009 IRIS       | +                                           | +                                       | +                                                         | +                                               | ?                                        |
| Stockburger2011 PREVENTHF | +                                           | +                                       | ?                                                         | ?                                               | +                                        |
| Strickberger2003 AMIOVIRT | ?                                           | ?                                       | ?                                                         | ?                                               | +                                        |
| Tang 2010 RAFT            | ?                                           | ?                                       | +                                                         | ?                                               | +                                        |
| Thibault 2013LESSER-EARTH | ?                                           | ?                                       | +                                                         | +                                               | +                                        |
| van Geldorp 2010          | ?                                           | ?                                       | +                                                         | +                                               | +                                        |
| Young 2003 MIRACLE ICD    | +                                           | +                                       | +                                                         | ?                                               | ?                                        |
| Yu 2009 PACE              | +                                           | +                                       | +                                                         | +                                               | +                                        |

Appendix Figure B: Egger's plot: relation of precision to standardized effect.

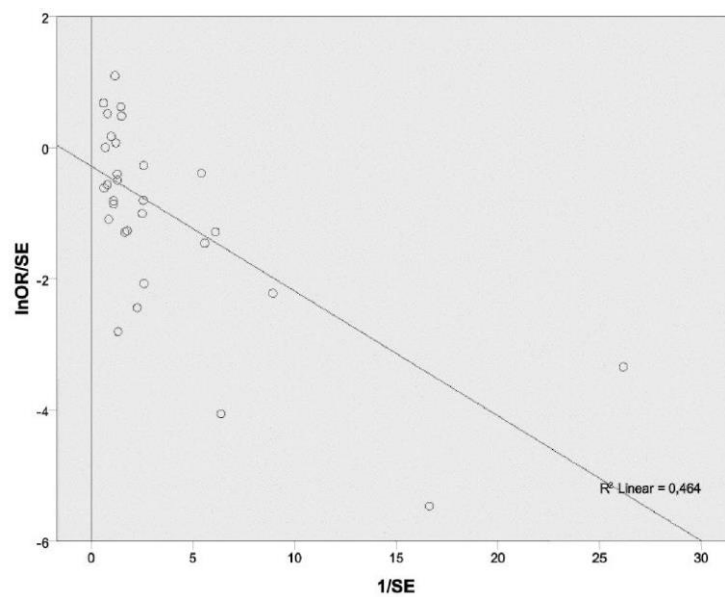

Appendix Figure C: Subgroup analysis, with evaluation of efficacy of CRT versus inactive CRT in trials with non – crossover and crossover design

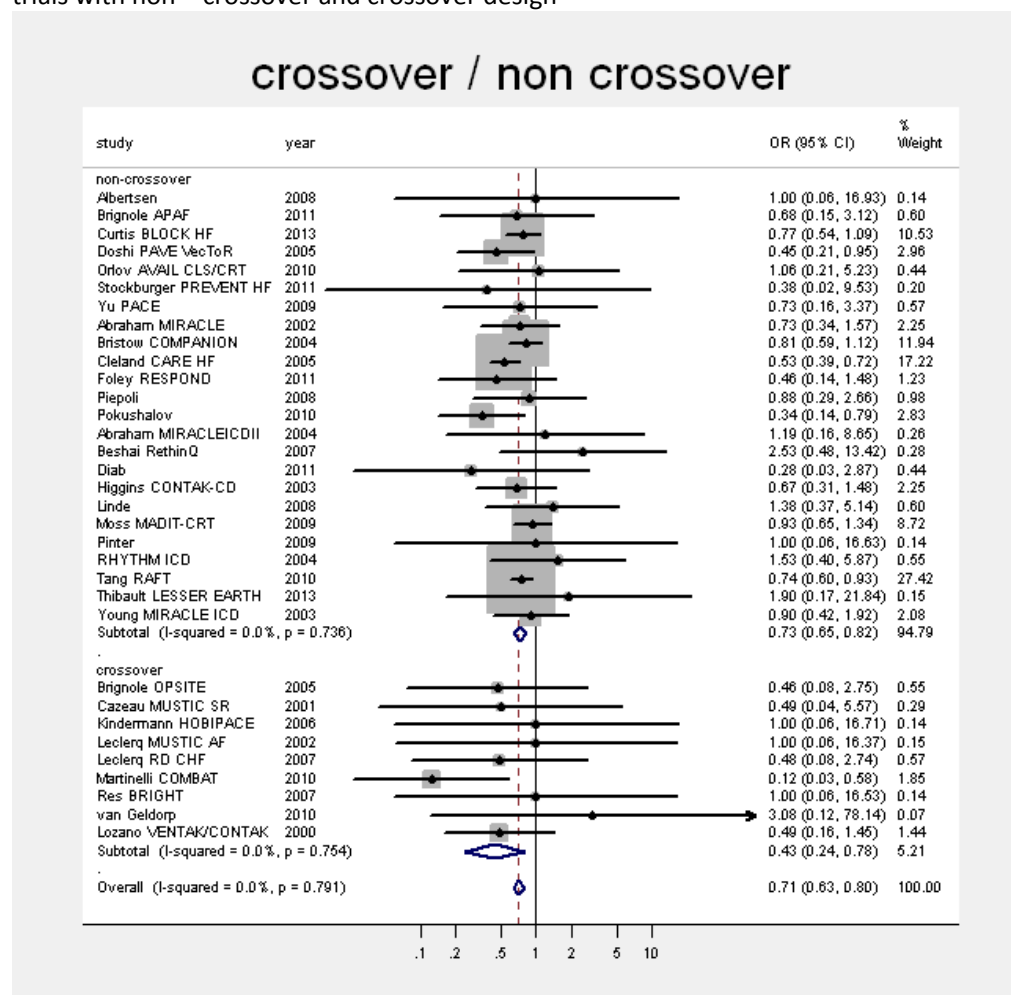

Appendix Figure D: Efficacy of CRT versus OMT with subgroup analysis 'without previous pacemaker' and 'previous pacemaker', and the overall estimation

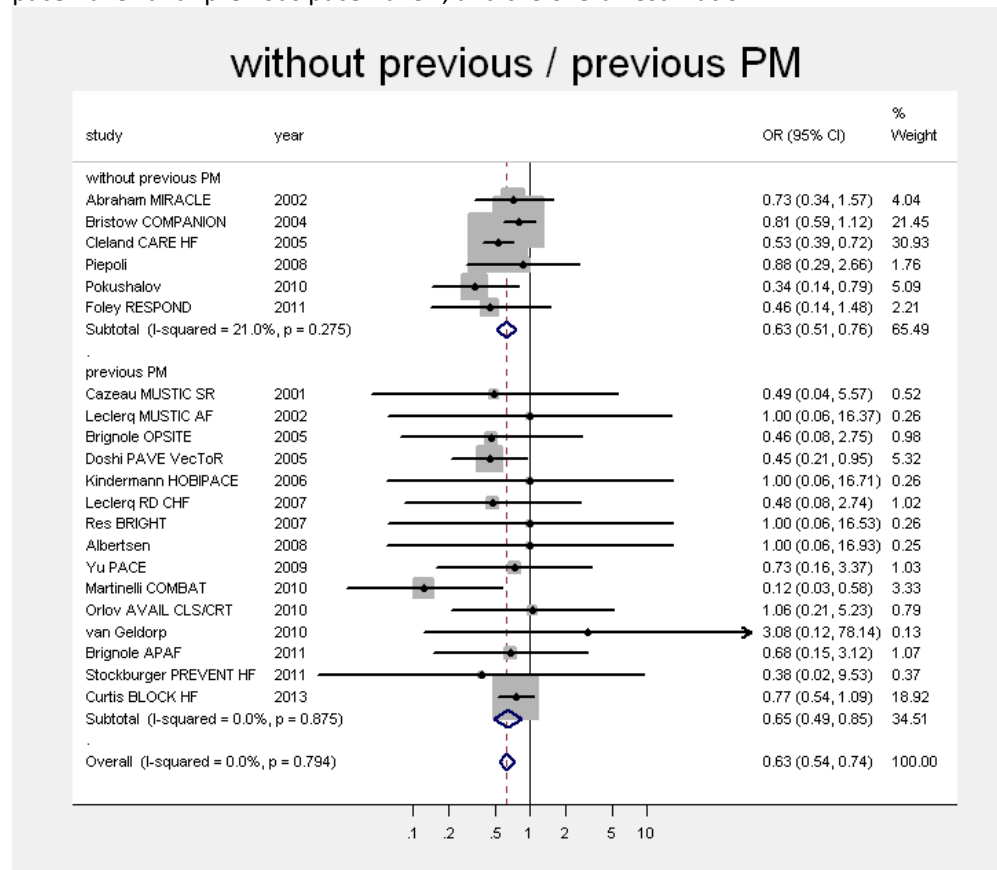

Appendix Figure E: Compared efficacy in the evaluation of mortality in the different options, with superiority of CRT vs OMT in patients without previous pacemaker (PM)

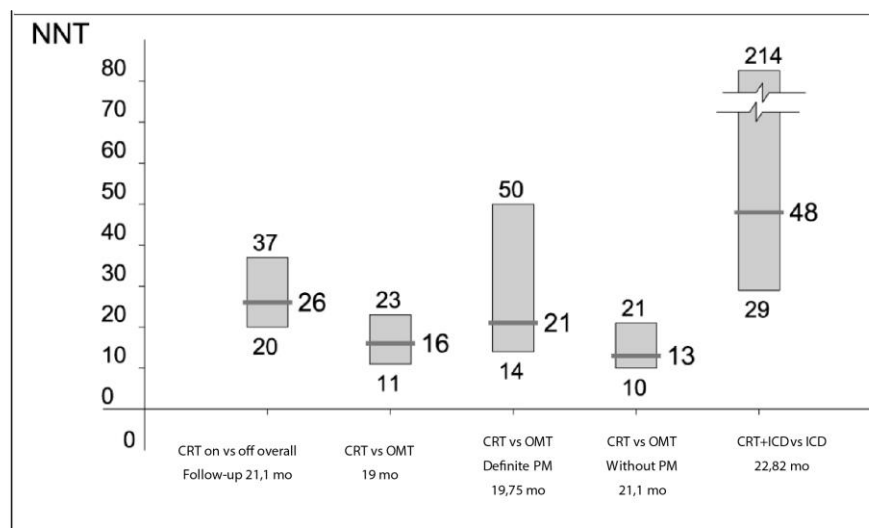

Appendix Figure F. Evaluation of efficacy in comparison of CRT+ICD versus ICD.

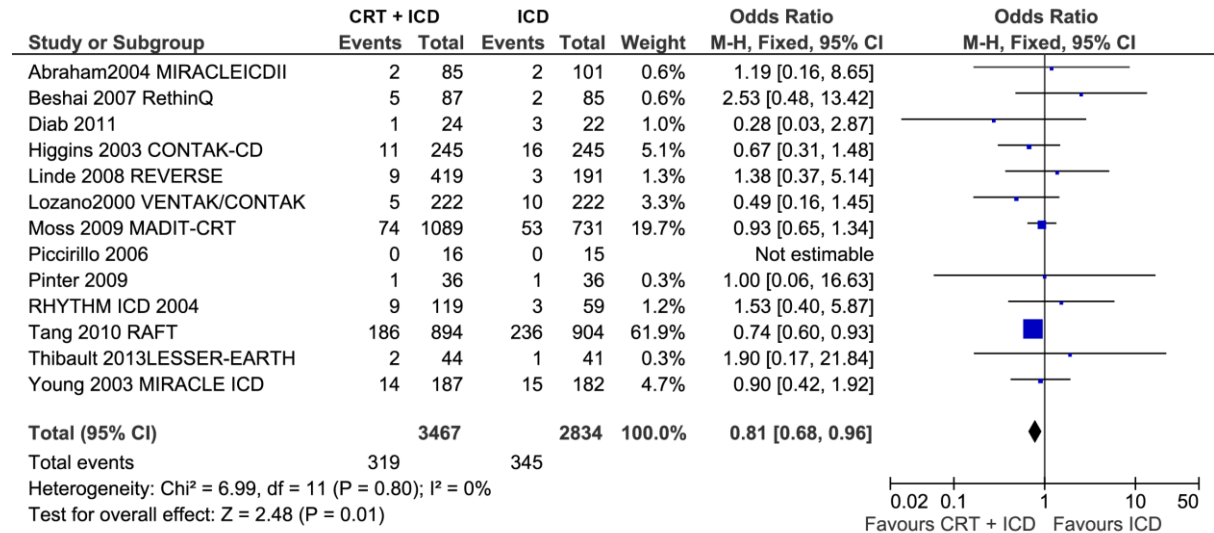

Appendix Figure G. Evaluation of efficacy in comparison of ICD versus OMT.

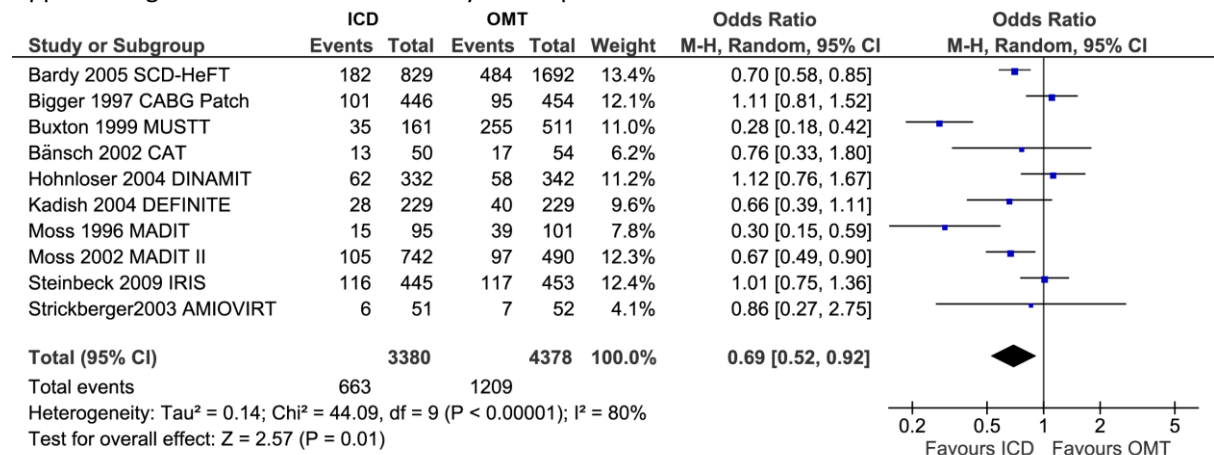

Appendix Figure H. Network with the different included studies in the compared options.

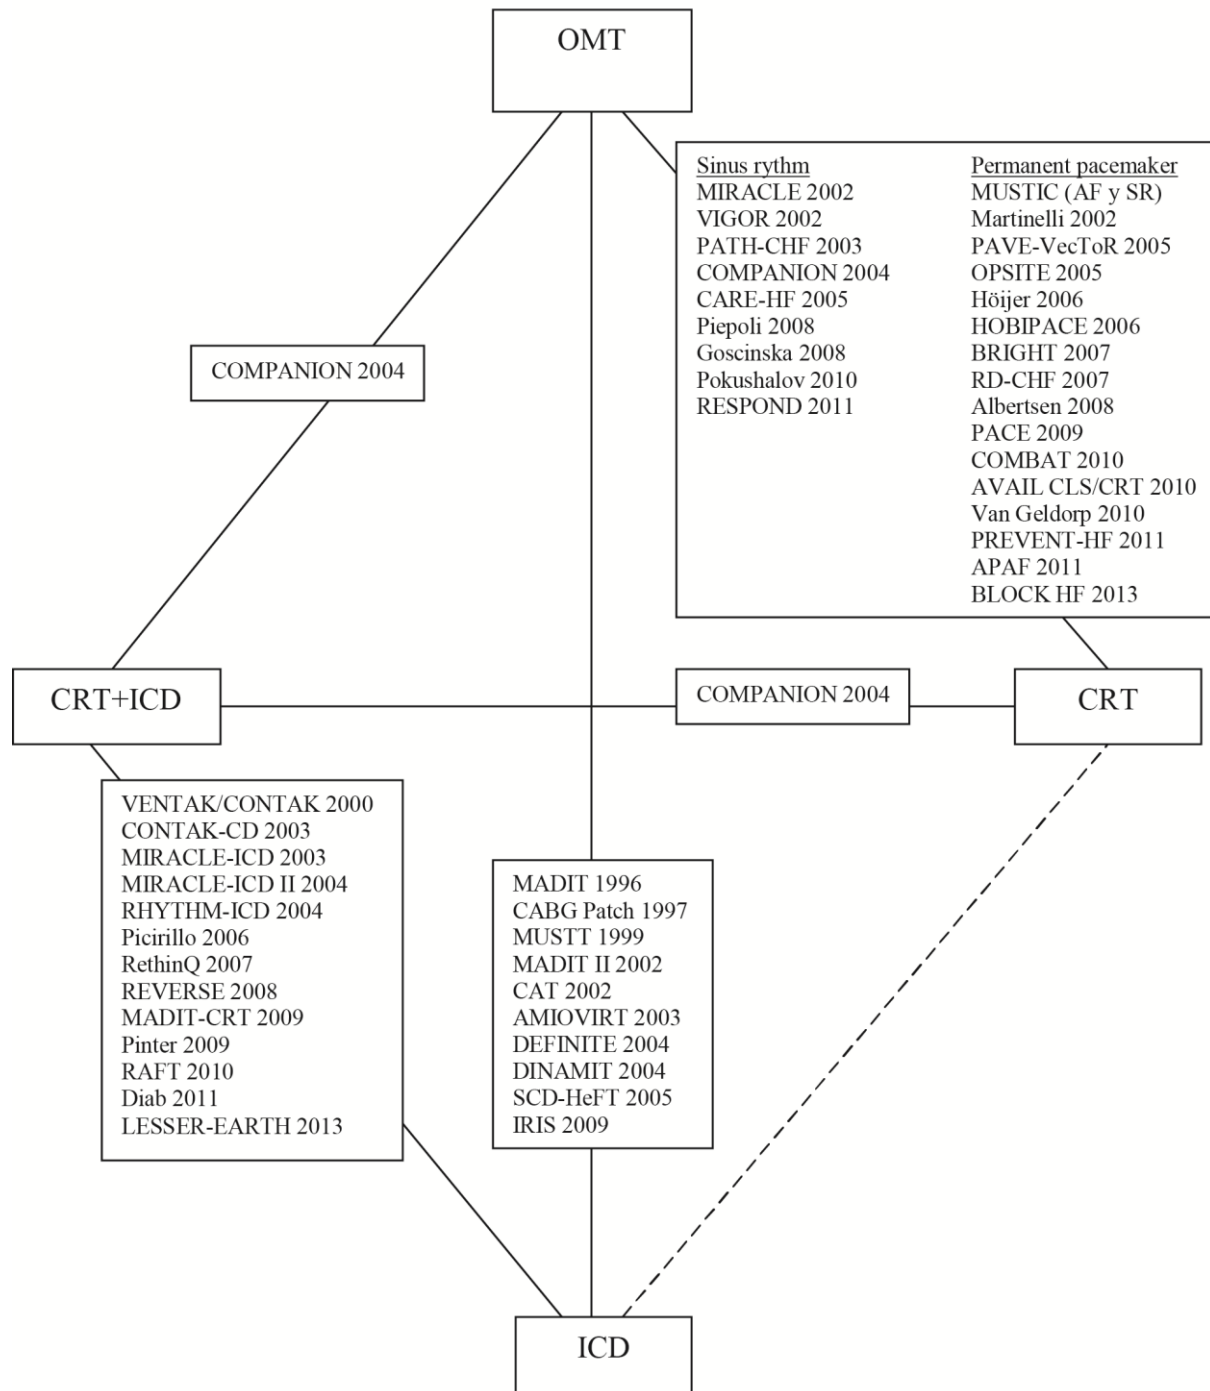

Supplement: heartasia-2015-010634supp.pdf [file heartasia-2015-010634supp.pdf]
